# Supplementary material
Source: publisher site journal article supplement (https://www.degruyterbrill.com/publication/isbn/9783110334241/downloadAsset/9783110334241_Inhaltsverzeichnis.pdf)
Supplement: Supplementary file 1 [file 9783110334241_Inhaltsverzeichnis.pdf]

# Inhalt

|                                                               |          |
|---------------------------------------------------------------|----------|
| Vorwort                                                       | VII      |
| Übersehene Sichtbarkeit(en): Einleitung und Überblick         | I        |
| <b>I Exploration des Forschungsfelds</b>                      | <b>7</b> |
| 1 Graphische Variation: Eingrenzungen des Gegenstandsbereichs | 9        |
| 1.1 Typographie . . . . .                                     | 9        |
| 1.2 Graphie und Skripturalität . . . . .                      | 15       |
| 1.3 Medium, Medialität und Materialität . . . . .             | 20       |
| 2 ›(Un-)Sichtbarkeit‹ als diskursives Phänomen                | 29       |
| 2.1 ›Lesbarkeit‹ versus ›Sichtbarkeit‹ . . . . .              | 30       |
| 2.2 Die ›Transparenz‹ des Mediums . . . . .                   | 53       |
| 2.3 Schlussfolgerungen . . . . .                              | 56       |
| 3 Zugänge zu Graphie und Skripturalität                       | 59       |
| 3.1 Jenseits der Sprachwissenschaft . . . . .                 | 60       |
| 3.1.1 Gestaltungstheorie . . . . .                            | 60       |
| 3.1.2 Psychologie . . . . .                                   | 69       |
| 3.1.3 Literatur- und Editionswissenschaften . . . . .         | 75       |
| 3.2 Linguistik und Semiotik . . . . .                         | 81       |
| 3.2.1 Linguistik und Schrift(lichkeit) . . . . .              | 82       |
| 3.2.2 Schriftlinguistik . . . . .                             | 106      |
| 3.2.3 Textrezeptions- und Textverständlichkeitsforschung      | 127      |
| 3.2.4 Werbe(sprach)forschung . . . . .                        | 134      |
| 3.2.5 Textlinguistik und Stilistik . . . . .                  | 137      |
| 3.2.6 Semiotik und Sozialesemiotik . . . . .                  | 150      |
| 3.2.7 Soziolinguistik . . . . .                               | 163      |
| 3.3 Fazit und Fokussierung . . . . .                          | 166      |

|            |                                                                                               |            |
|------------|-----------------------------------------------------------------------------------------------|------------|
| <b>II</b>  | <b>Theoretische Modellierung</b>                                                              | <b>169</b> |
| 4          | Soziolinguistische Verortung                                                                  | 171        |
| 4.1        | Vom sozialen Index zur sozialen Praxis . . . . .                                              | 172        |
| 4.2        | Grundannahmen der interpretativen Soziolinguistik . . . . .                                   | 176        |
| 4.3        | Von der sprachlichen zur graphischen Variation . . . . .                                      | 180        |
| 5          | Graphisches Wissen                                                                            | 183        |
| 5.1        | Rudi Kellers »Theorie semiotischen Wissens« . . . . .                                         | 185        |
| 5.2        | Rezipienten als Kommunikationsakteure und die<br>Performativität von Sinn . . . . .           | 191        |
| 5.3        | Semiotisches Wissen als Kontext- und Praxiswissen . . . . .                                   | 194        |
| 5.4        | Sinnperformativität, Kontext- und Praxiswissen:<br>Beispiel und Resümee . . . . .             | 199        |
| 5.5        | Vom »semiotischen« zum »graphischen« Wissen . . . . .                                         | 203        |
| 6          | Formen und Funktionen graphischer Variation                                                   | 209        |
| 6.1        | (Graphische) Variation . . . . .                                                              | 210        |
| 6.2        | Formen . . . . .                                                                              | 212        |
| 6.3        | Funktionen . . . . .                                                                          | 220        |
| 6.3.1      | Polyfunktionalität und Multimodalität,<br>Grunddimensionen und generelle Funktionen . . . . . | 221        |
| 6.3.2      | Soziale Funktionen . . . . .                                                                  | 229        |
| <b>III</b> | <b>Anwendungsfelder</b>                                                                       | <b>235</b> |
| 7          | Genres                                                                                        | 237        |
| 7.1        | Von »typographischen Dispositiven« zu »Genreindikatoren« . . . . .                            | 238        |
| 7.1.1      | Typographische Dispositive . . . . .                                                          | 238        |
| 7.1.2      | Textsorten und Genres . . . . .                                                               | 241        |
| 7.1.3      | Genreindikatoren . . . . .                                                                    | 247        |
| 7.2        | Beispielanalysen: Genrekonstitution in der Fußball(fan)kultur                                 | 250        |
| 7.2.1      | Genrehäufige Textsorten und generische Texte . . . . .                                        | 251        |
| 7.2.2      | Ebenen graphischer Genrekonstitution . . . . .                                                | 256        |
| 7.2.3      | Genres als Kontext und Stabilisator skripturaler<br>Kommunikation . . . . .                   | 278        |
| 7.3        | Zusammenfassung . . . . .                                                                     | 279        |

|                  |                                                                                          |            |
|------------------|------------------------------------------------------------------------------------------|------------|
| 8                | Ideologien                                                                               | 281        |
| 8.1              | Sprach- und Kommunikationsideologien . . . . .                                           | 282        |
| 8.2              | Graphie-Ideologien: Definition und theoretische Einbindung                               | 286        |
| 8.3              | Beispielanalysen: Konstruktionen graphischen ›Deutschtums‹                               | 289        |
| 8.3.1            | »Der deutscheste aller Buchstaben« . . . . .                                             | 292        |
| 8.3.2            | ›Deutsche Schriften‹ . . . . .                                                           | 297        |
| 8.3.3            | Gebrochene Schriften und/als Ideologie . . . . .                                         | 305        |
| 8.3.4            | Ein popkulturelles Revival? . . . . .                                                    | 314        |
| 8.3.5            | Graphie-ideologische Verhandlungen auf Wikipedia                                         | 324        |
| 8.4              | Zusammenfassung . . . . .                                                                | 334        |
| 9                | Identitäten                                                                              | 337        |
| 9.1              | Identität und kommunikative Praxis . . . . .                                             | 338        |
| 9.2              | Identität als soziale Positionierung . . . . .                                           | 346        |
| 9.2.1            | Was heißt ›soziale Positionierung‹? . . . . .                                            | 346        |
| 9.2.2            | Soziale Positionierung als Vergemeinschaftung . . . . .                                  | 348        |
| 9.2.3            | Positionierungspraktiken: Stilbildung und Stilisierung                                   | 352        |
| 9.3              | Beispielanalysen: Identitätskonstitutive (Zu-)Schreibungen                               | 360        |
| 9.3.1            | »Schwarz ist, was Ihr draus macht!« – Popkultur<br>und Szenekommunikation . . . . .      | 360        |
| 9.3.2            | »Your very own font!« – emulierte Handschrift<br>als Authentizitätsversprechen . . . . . | 401        |
| 9.3.3            | Doing science (by design) – Identität und Gestalt<br>in der Wissenschaft . . . . .       | 411        |
| 9.4              | Zusammenfassung . . . . .                                                                | 429        |
| 10               | Graphische Variation als soziale Praxis:<br>Zusammenfassung und Fazit                    | 433        |
| <b>IV Anhang</b> |                                                                                          | <b>439</b> |
|                  | Tabellen und Abbildungen                                                                 | 441        |
|                  | Literatur                                                                                | 451        |
|                  | Namensregister                                                                           | 505        |
|                  | Sachregister                                                                             | 515        |
